# Supplementary figures and images for: Serotonin signaling by maternal neurons upon stress ensures progeny survival
Source: eLife journal article supplement (doi:10.7554/elife.55246), 2020-04-23

Figure 1-figure supplement 2

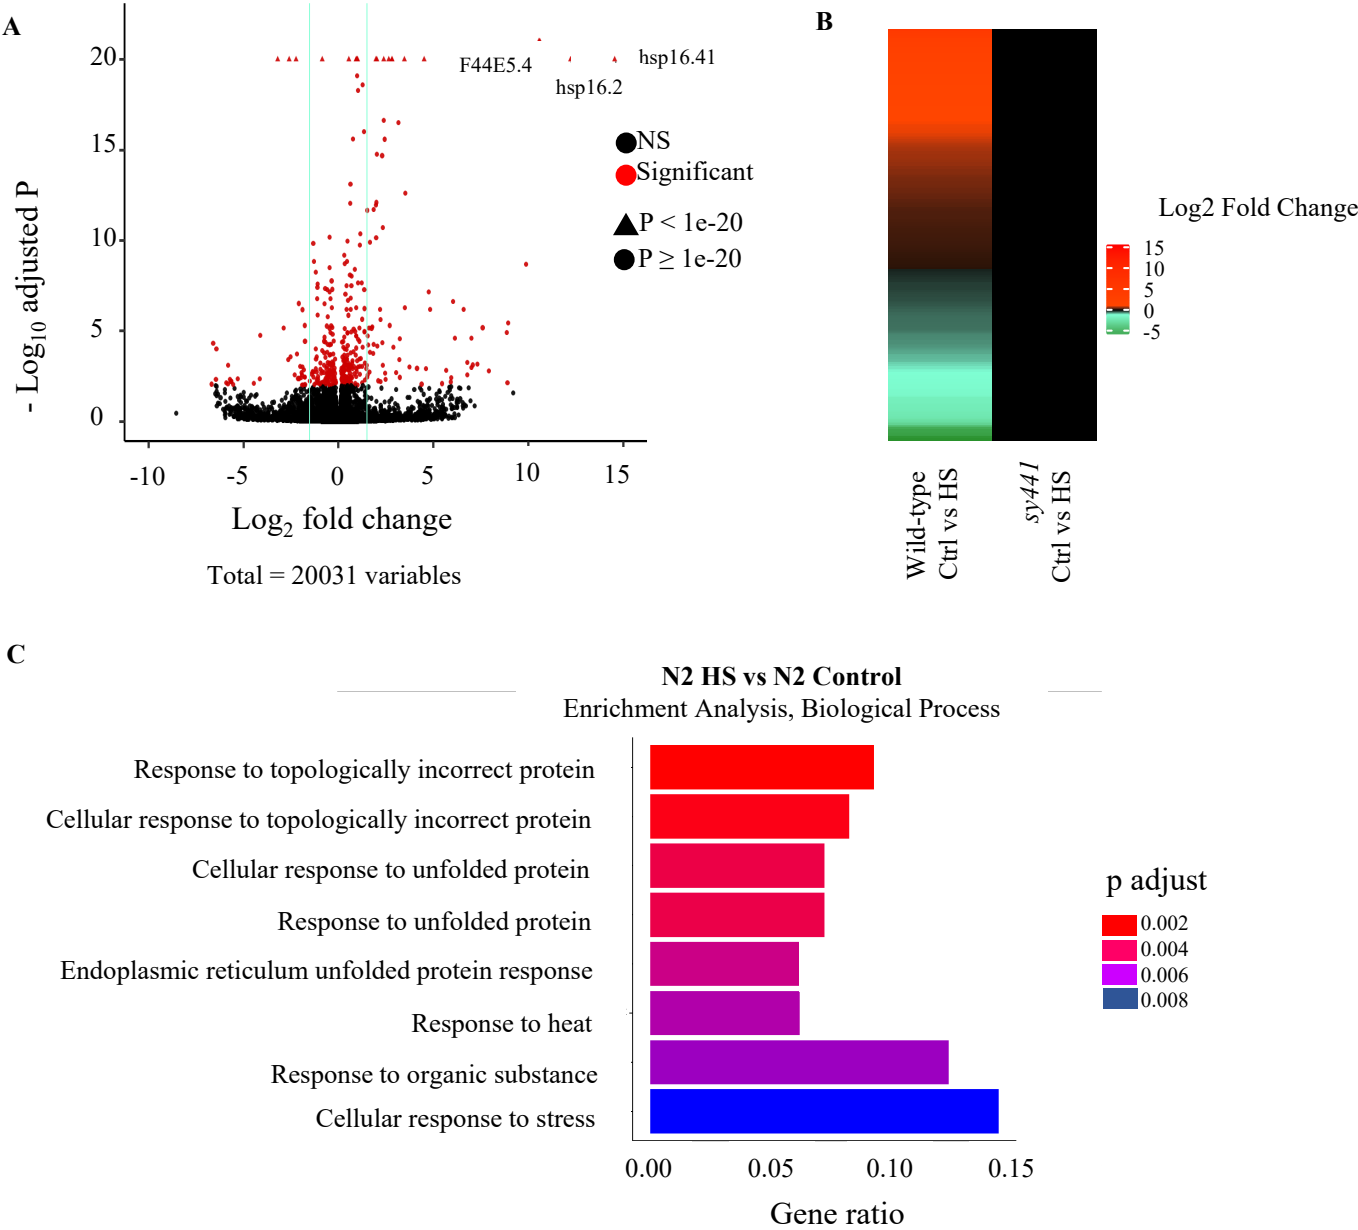

Supplement: supp [file elife-55246-supp-v1.zip]

**Figure 4-figure supplement 2**

**A**

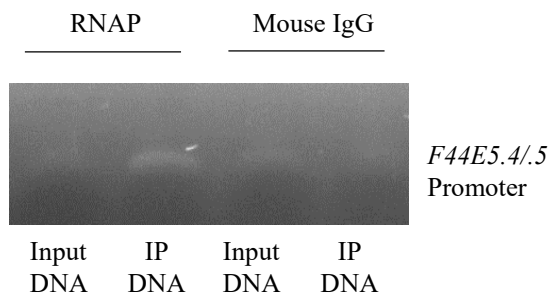

**B**

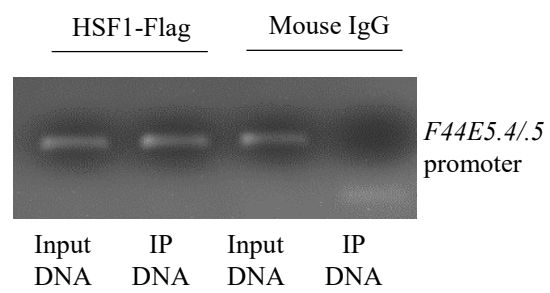

Supplement: supp [file elife-55246-supp-v1.zip]

**Figure 8-figure supplement 1**

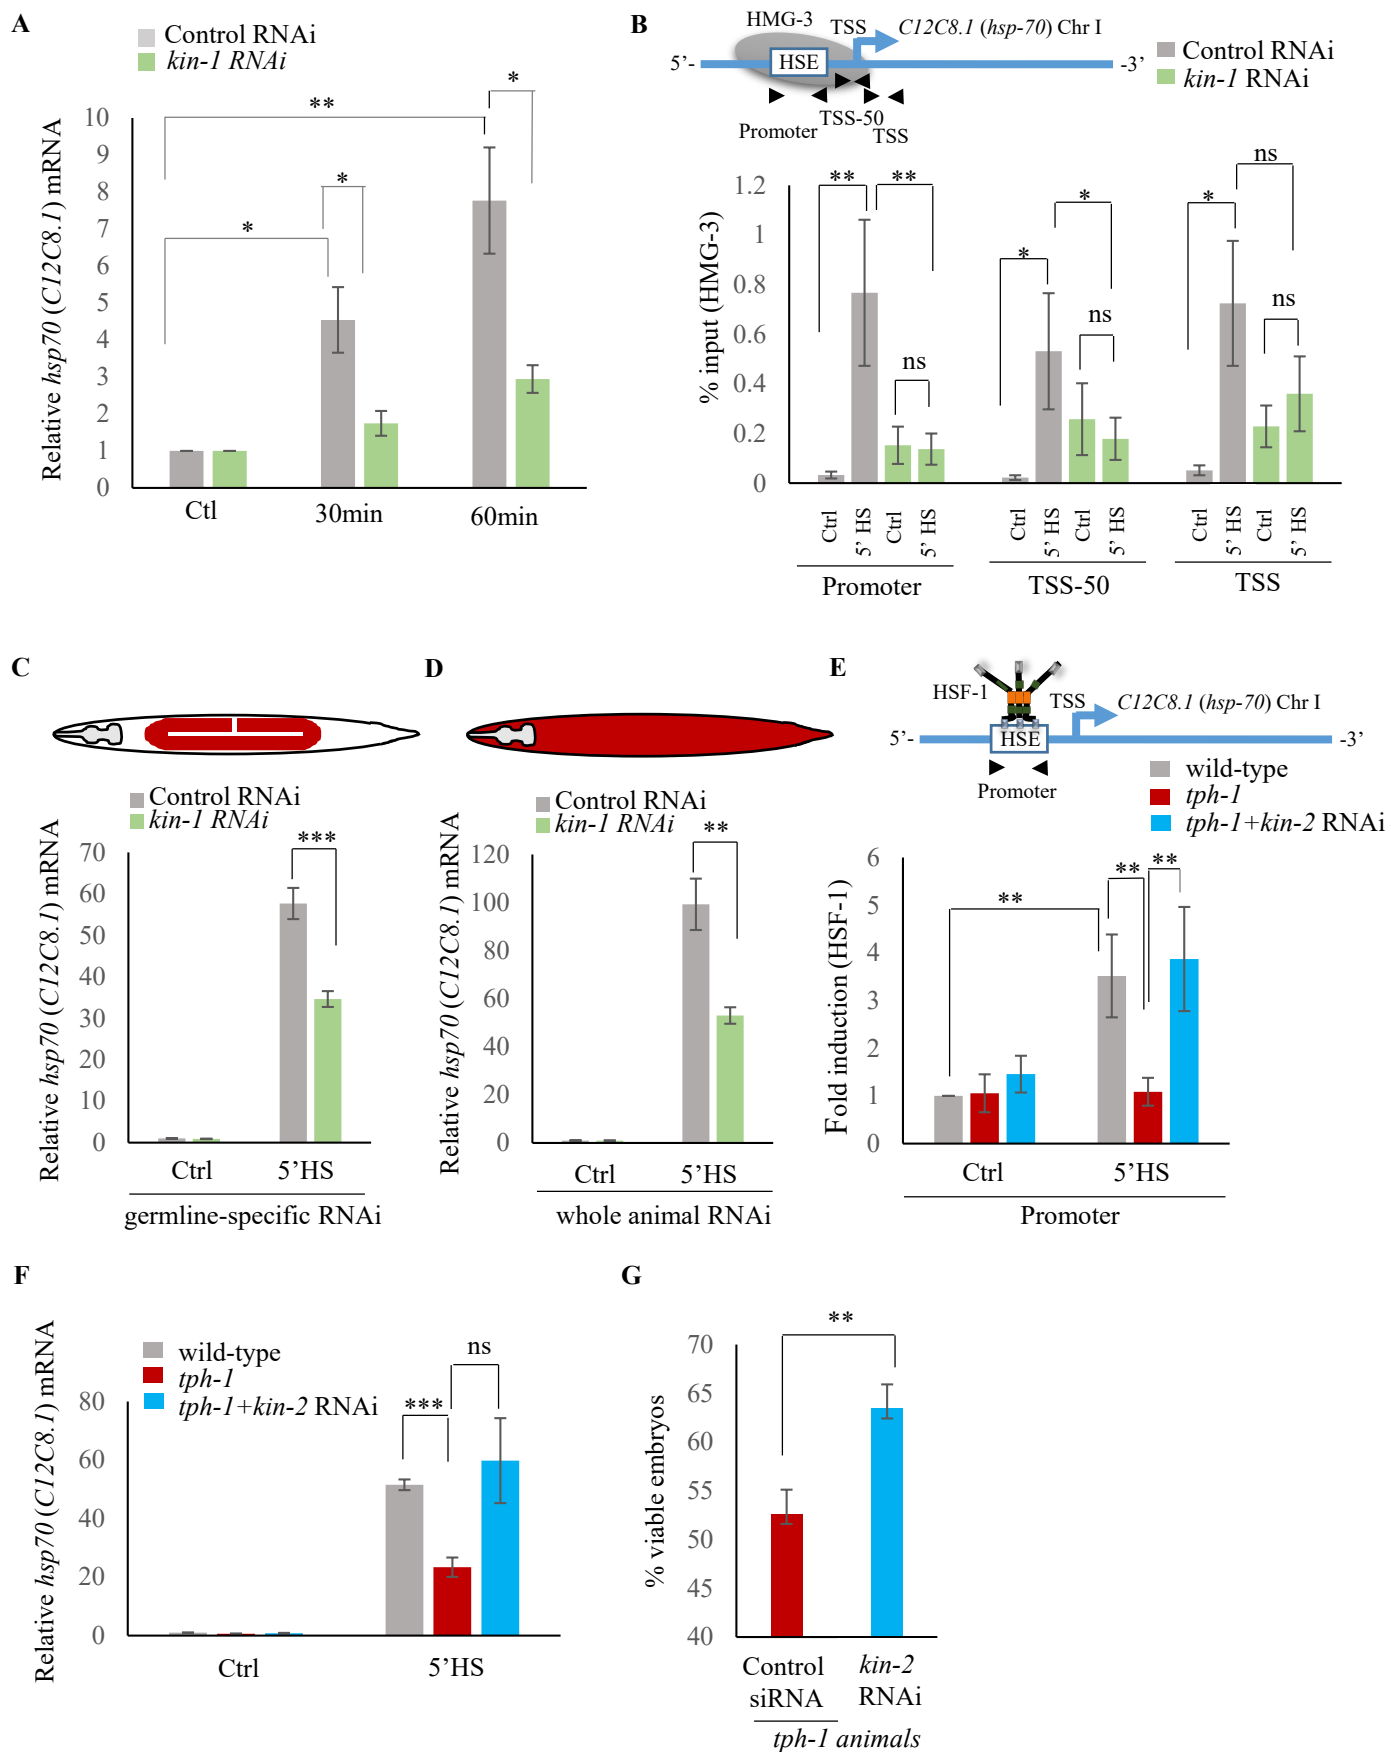

Supplement: supp [file elife-55246-supp-v1.zip]

**Figure 5-figure supplement 2**

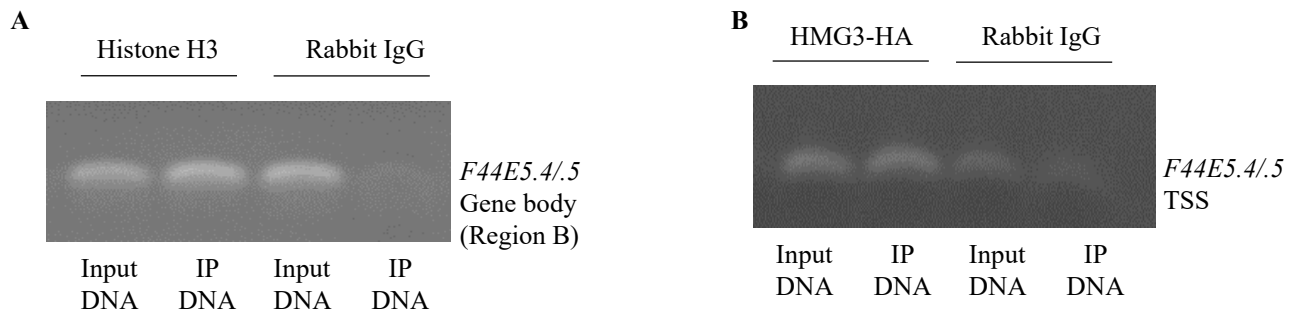

Supplement: supp [file elife-55246-supp-v1.zip]

Figure 3-figure supplement 1

A

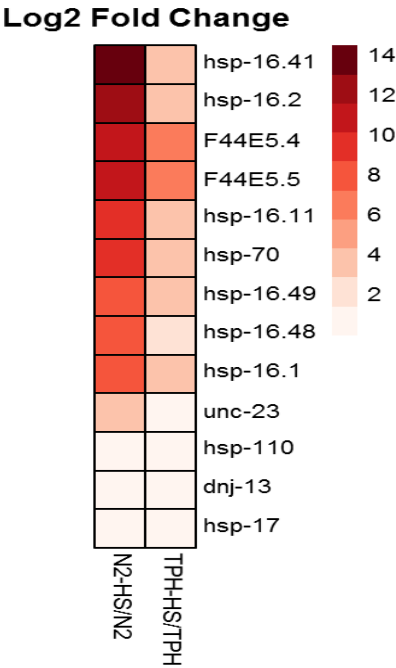

B

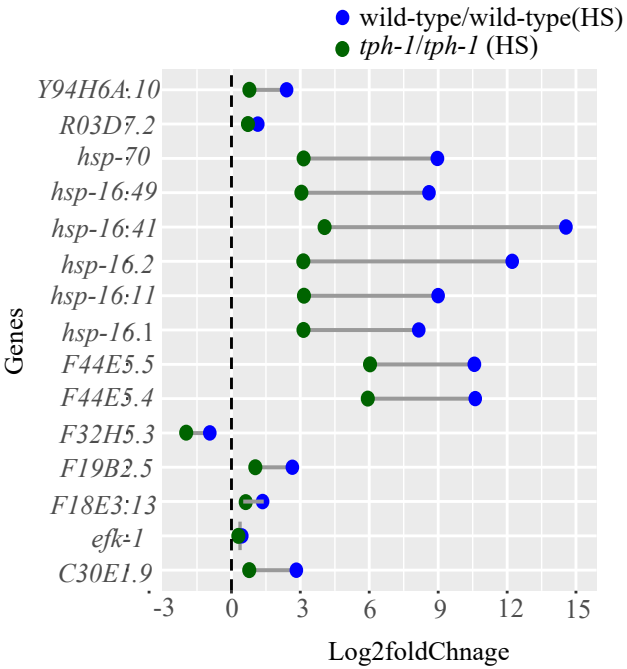

C

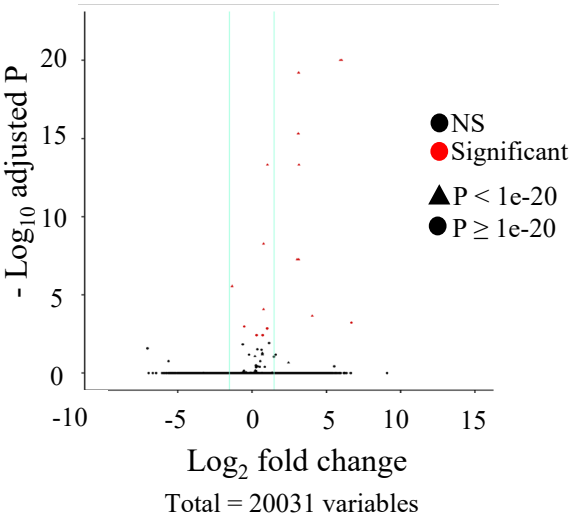

D

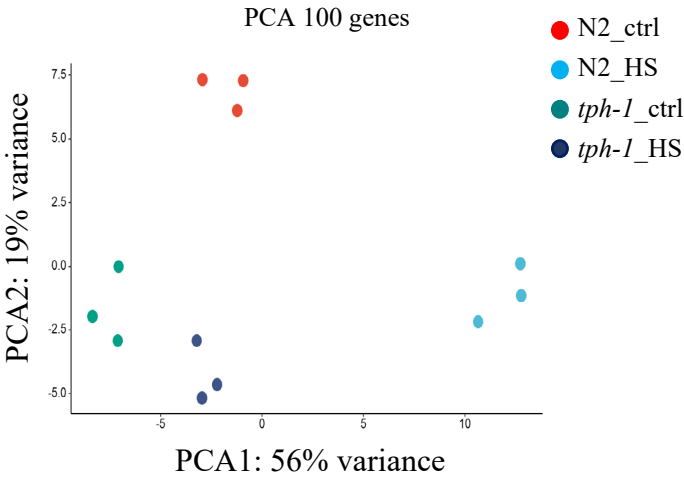

Supplement: supp [file elife-55246-supp-v1.zip]

**Figure 7-figure supplement 1**

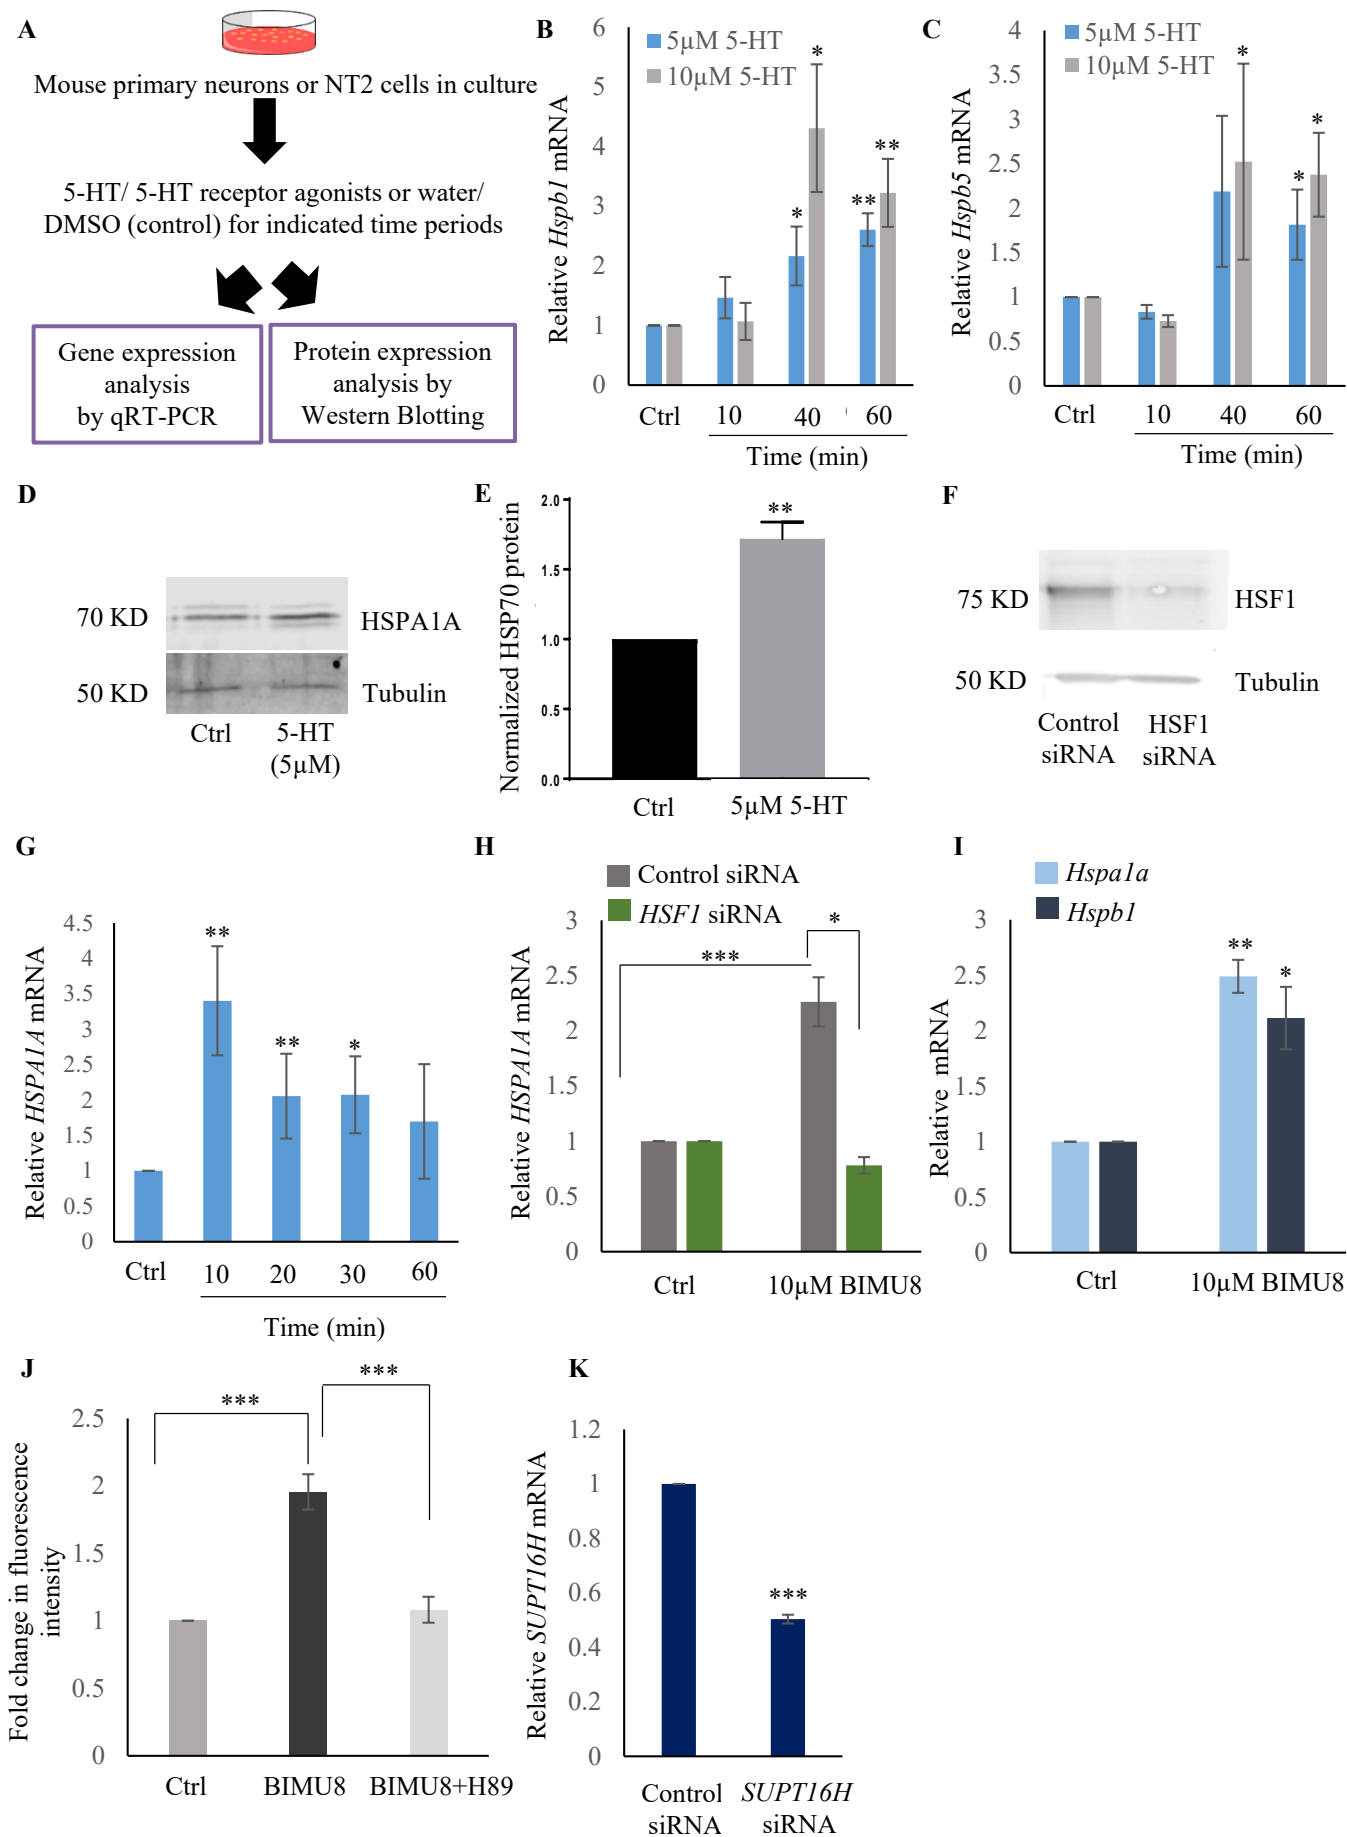

Supplement: supp [file elife-55246-supp-v1.zip]

Figure 1-figure supplement 3

A

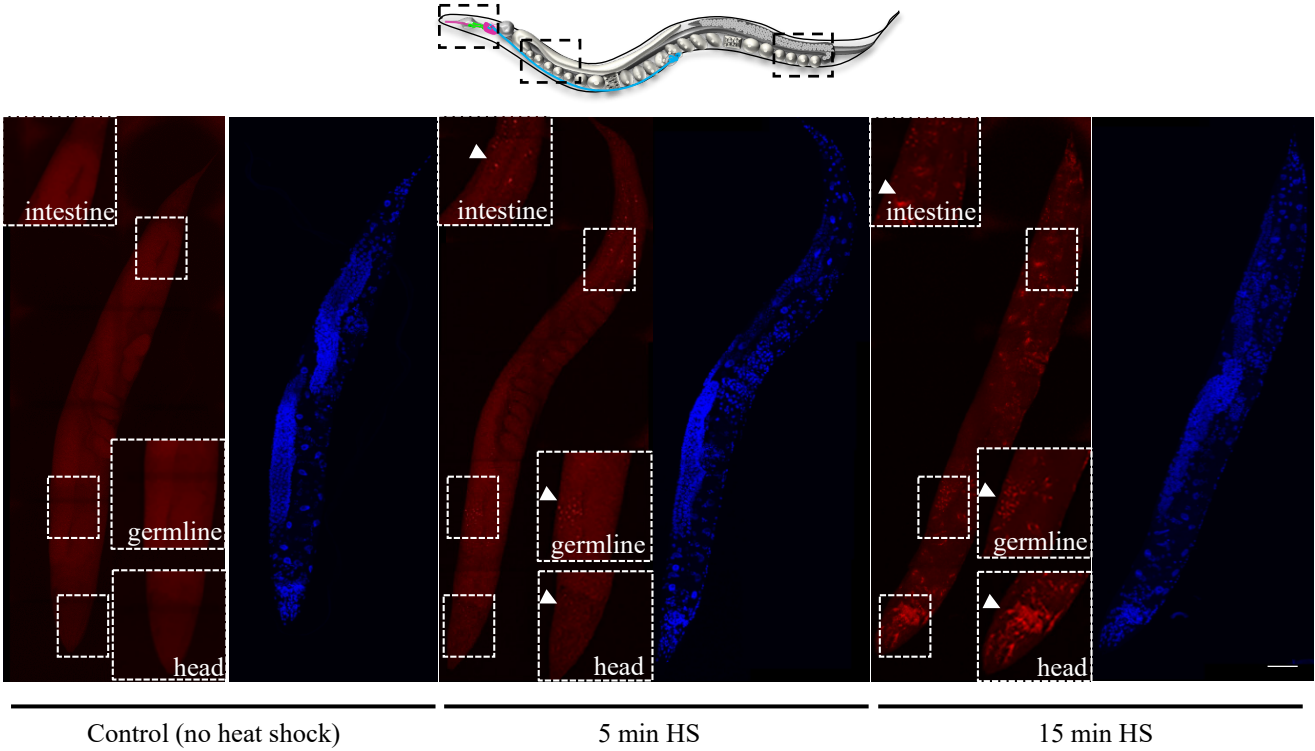

B

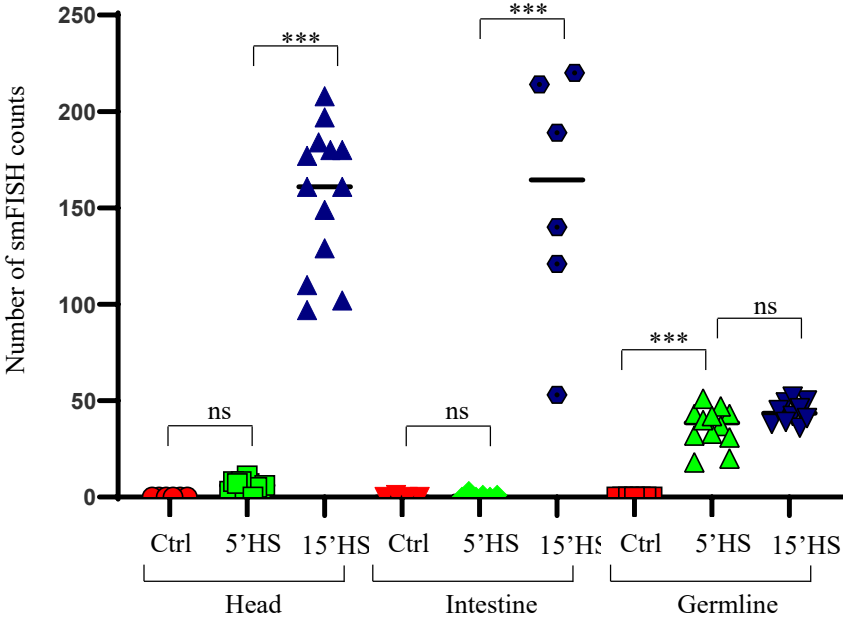

Supplement: supp [file elife-55246-supp-v1.zip]

Figure 1-figure supplement 1

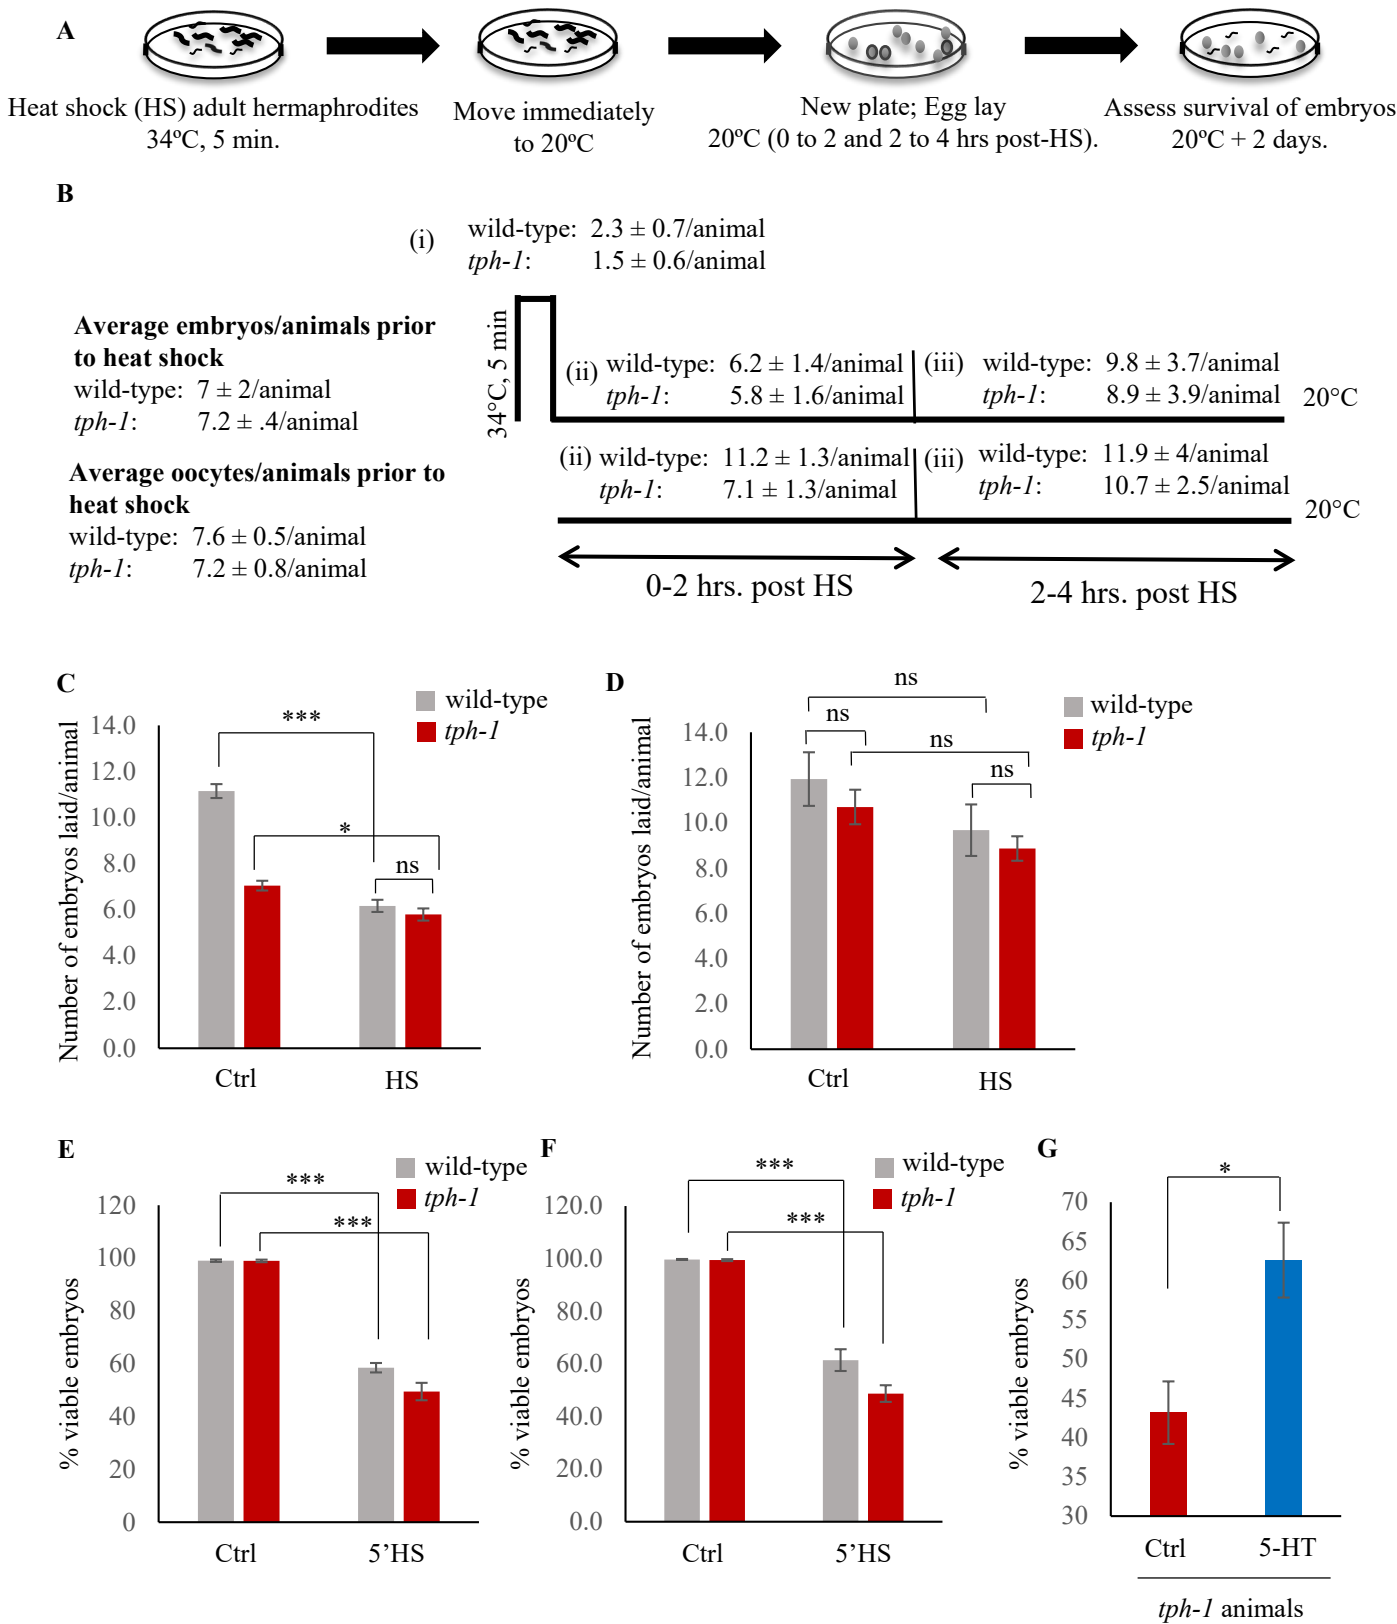

Supplement: supp [file elife-55246-supp-v1.zip]

**Figure 6- figure supplement 1**

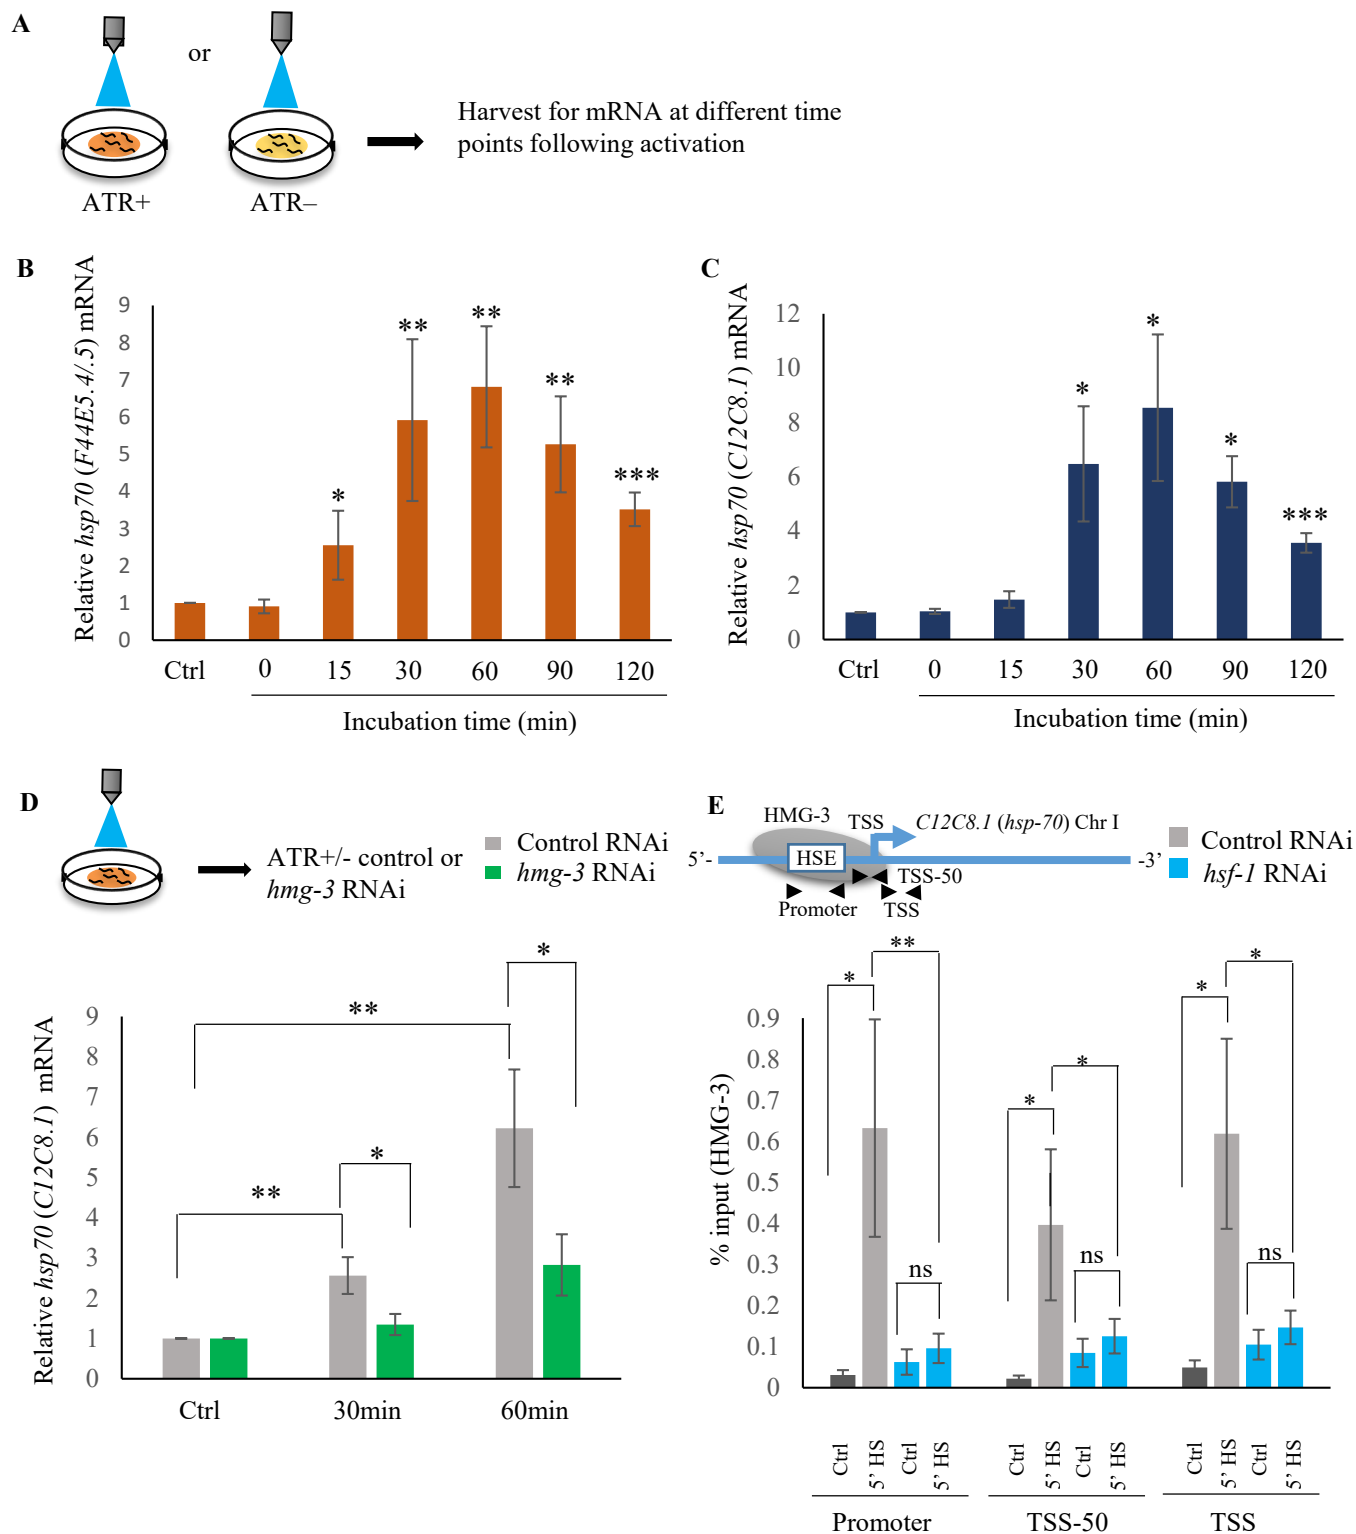

Supplement: supp [file elife-55246-supp-v1.zip]

**Figure 5-figure supplement 1**

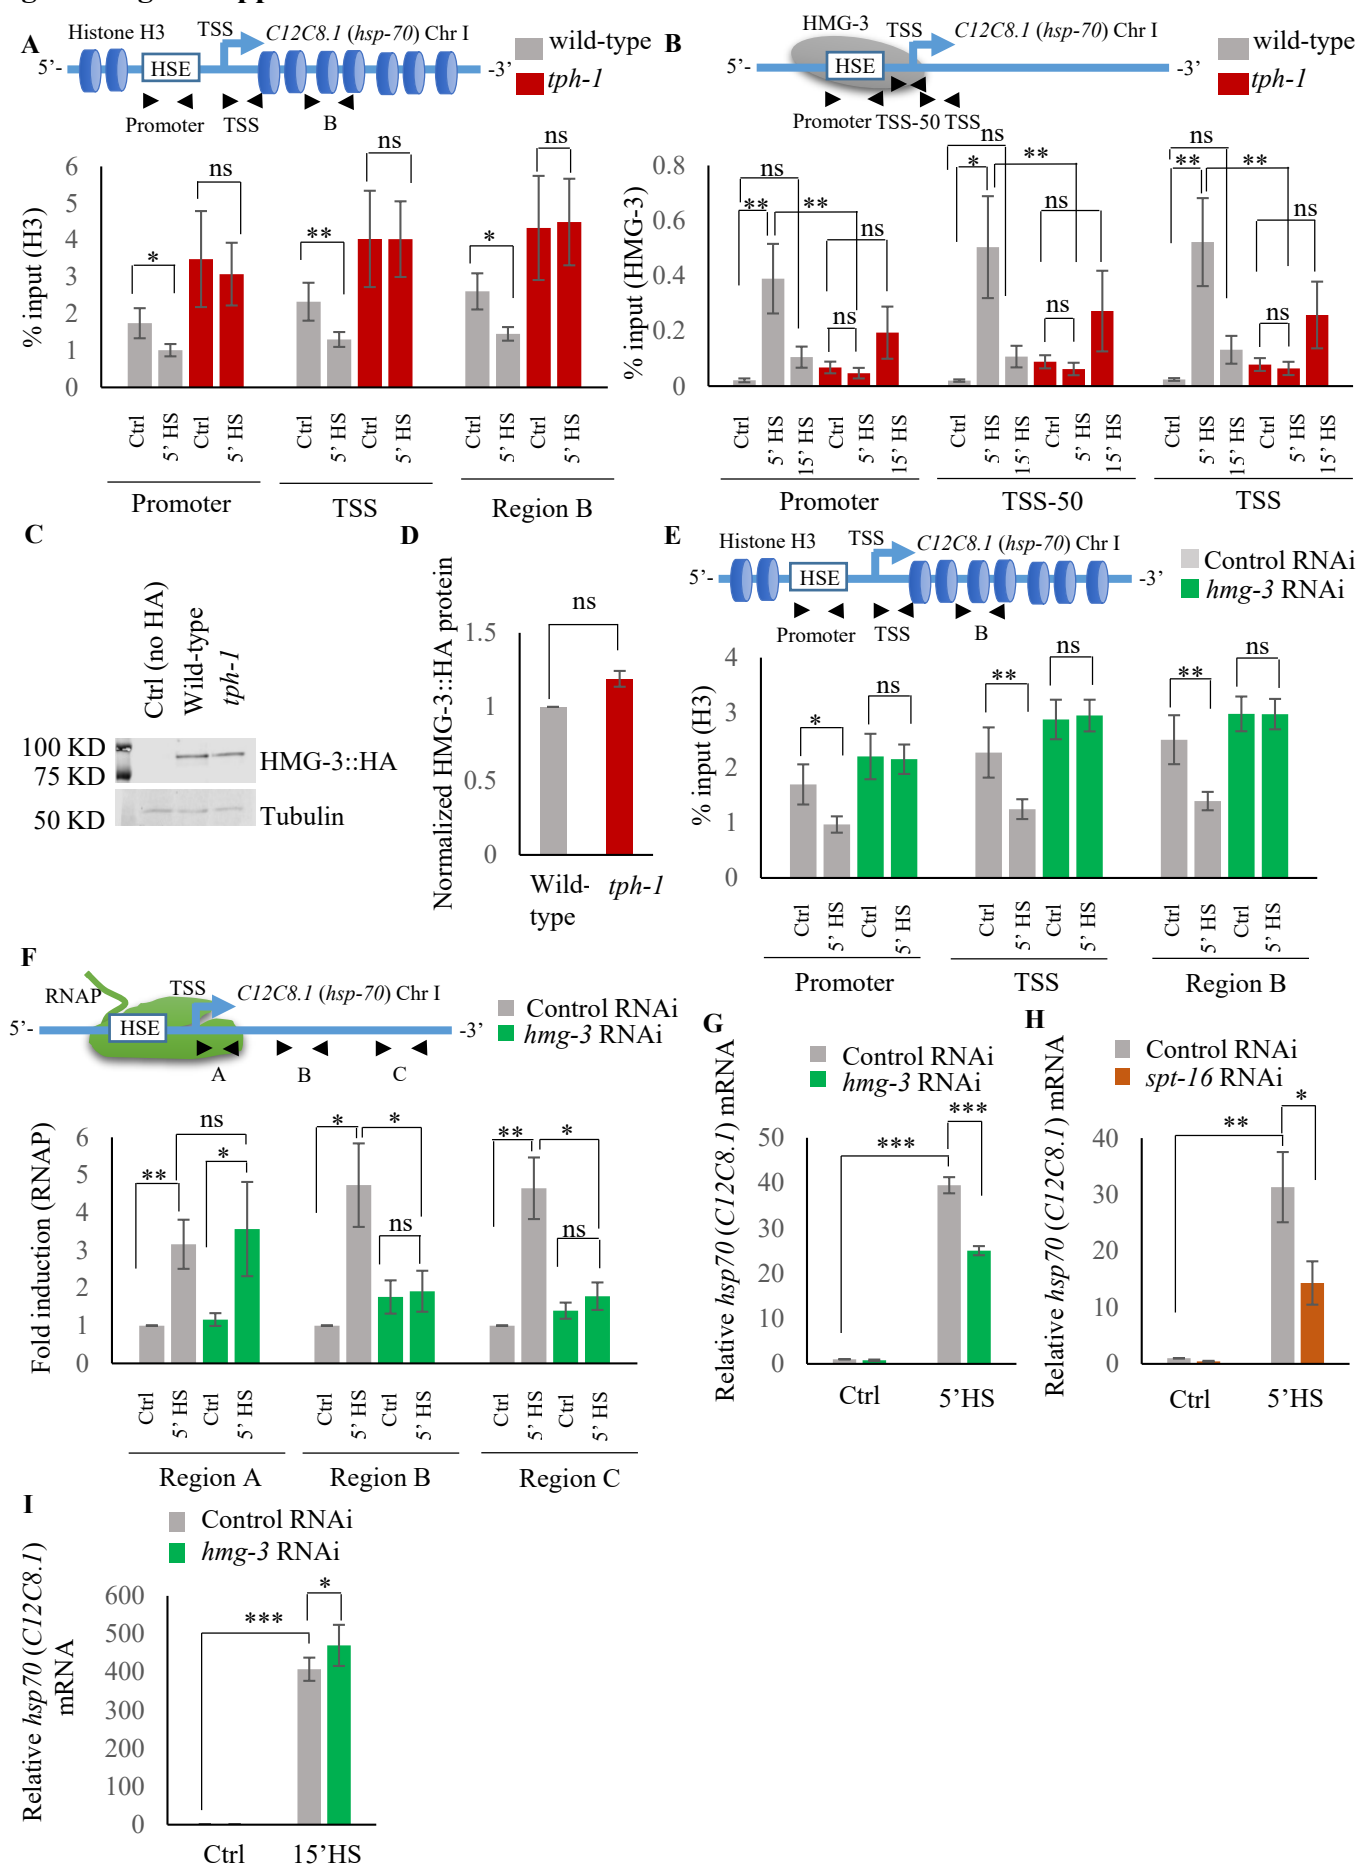

Supplement: supp [file elife-55246-supp-v1.zip]

**Figure 4-figure supplement 1**

**A**

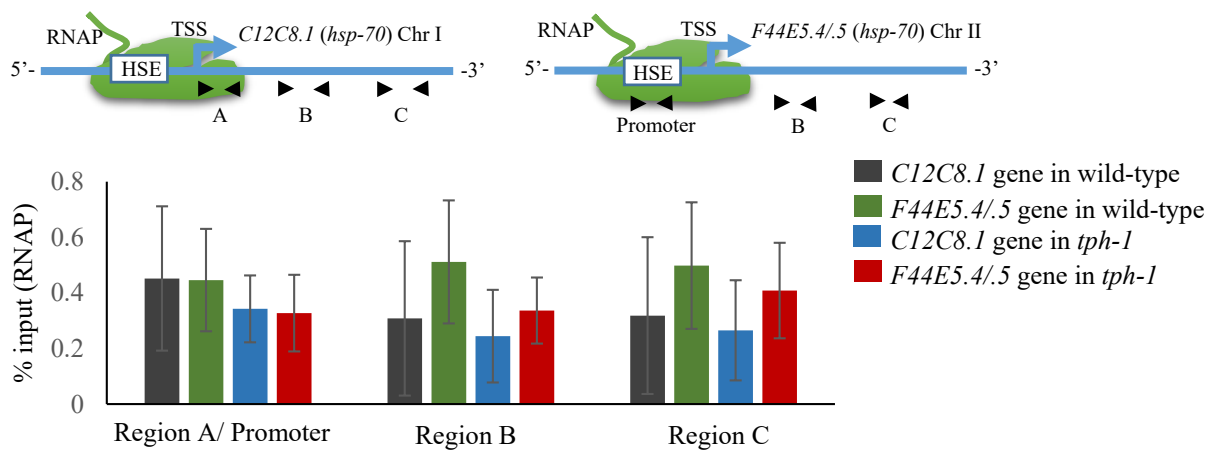

**B**

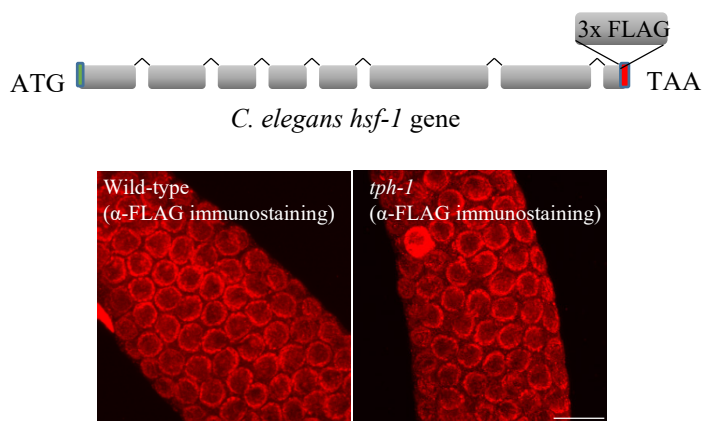

**C**

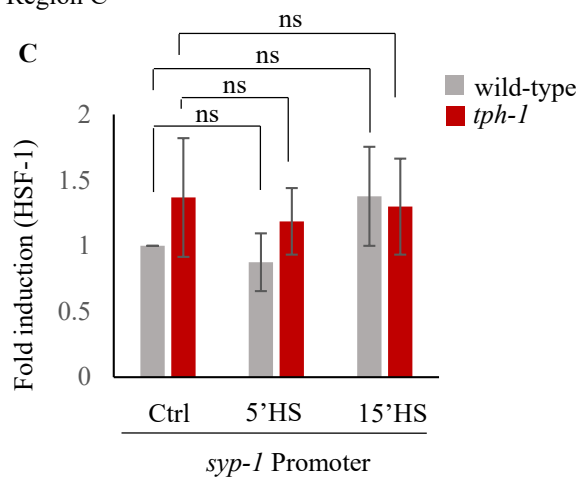

**D**

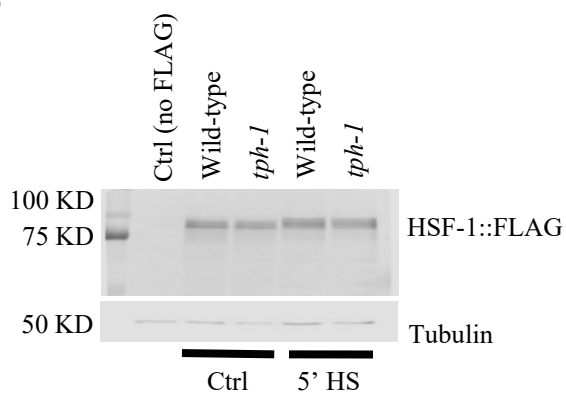

**E**

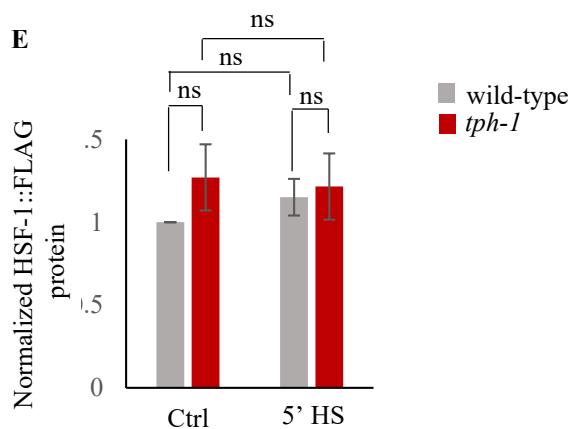

Supplement: supp [file elife-55246-supp-v1.zip]
